# Supplementary material for: Fabrication of SnO2–SnO nanocomposites with p–n heterojunctions for the low-temperature sensing of NO2 gas
Source: Royal Society of Chemistry journal article supplement (doi:10.1039/c5nr02334c), 2015-01-01
Supplement: c5nr02334c1.pdf [file c5nr02334c1.pdf]

Electronic Supplementary Information

**Fabrication of SnO-SnO<sub>2</sub> Nanocomposites with p-n Heterojunctions for  
Low-Temperature Sensing of NO<sub>2</sub> Gas**

Lei Li <sup>a,b</sup>, Chunmei Zhang <sup>a,c</sup> and Wei Chen <sup>a,\*</sup>

<sup>a</sup> State Key Laboratory of Electroanalytical Chemistry, Changchun Institute of Applied Chemistry, Chinese Academy of Sciences, Changchun 130022, People's Republic of China

<sup>b</sup> The College of Electrical and Electronic Engineering, Changchun University of Technology, Changchun, 130012, People's Republic of China

<sup>c</sup> University of Chinese Academy of Sciences, Beijing 100039, People's Republic of China

Corresponding author: [weichen@ciac.ac.cn](mailto:weichen@ciac.ac.cn)

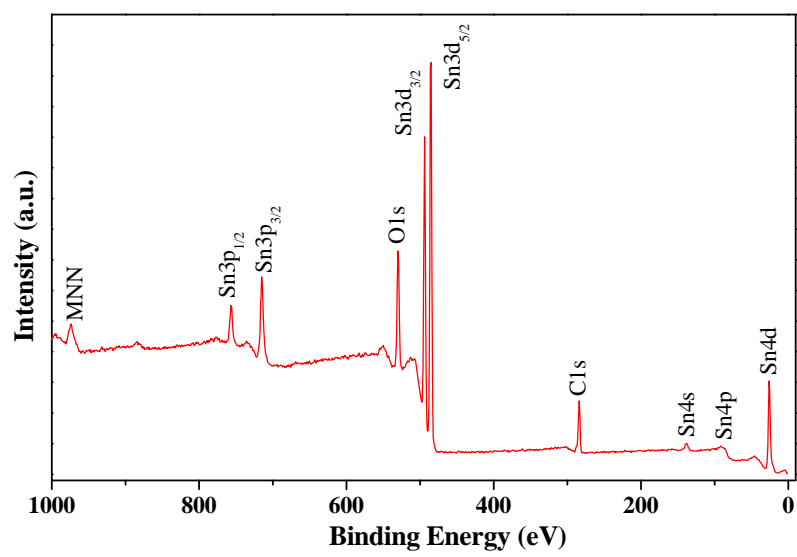

**Fig. S1** Survey XPS spectrum of the SnO<sub>2</sub>-SnO hybrid material.
